# Supplementary material for: ULK1 inhibition as a targeted therapeutic strategy for FLT3-ITD-mutated acute myeloid leukemia
Source: PubMed Central journal article supplement (PMC7212592; doi:10.1186/s13046-020-01580-4), 2020-05-11
Supplement: 13046_2020_1580_MOESM1_ESM.pdf [file 13046_2020_1580_MOESM1_ESM.pdf]

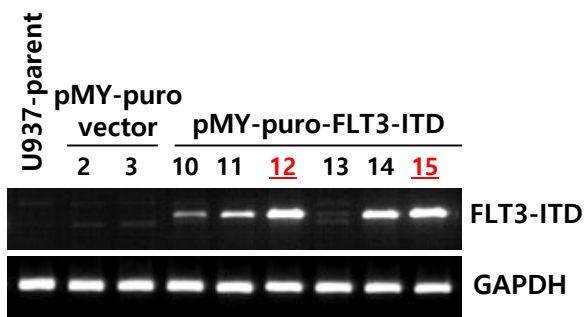

Figure S1.

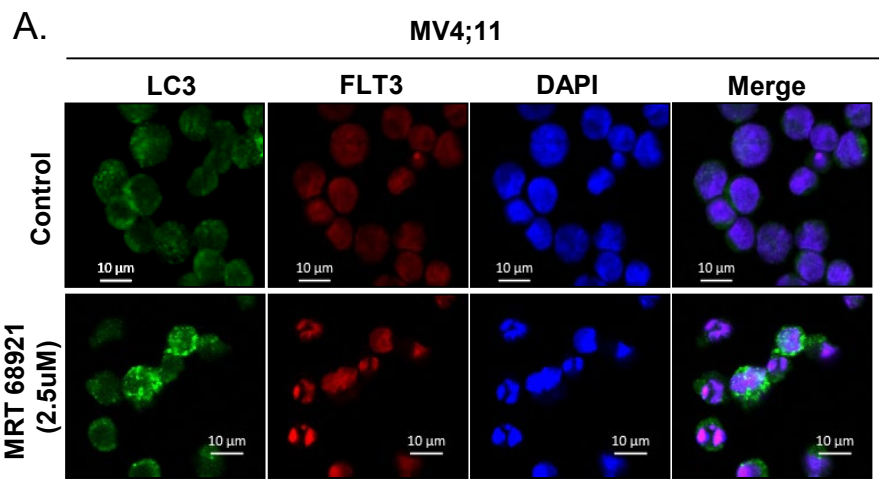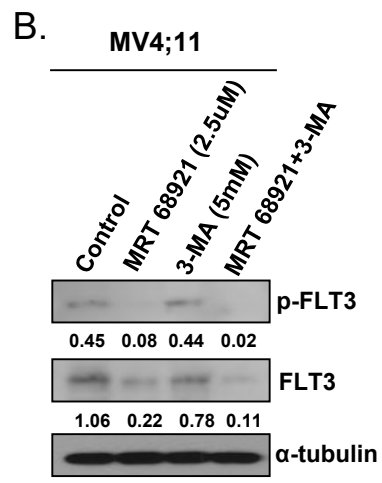

Figure S2.

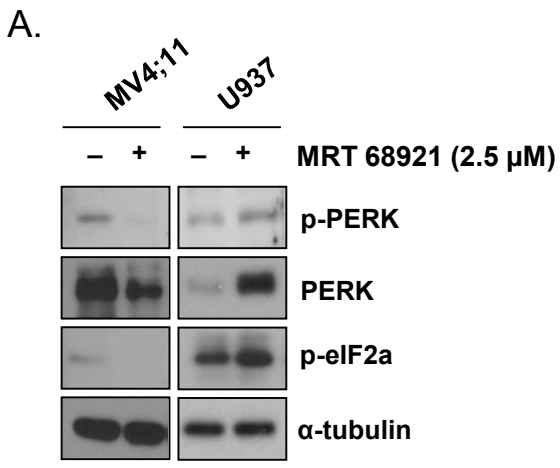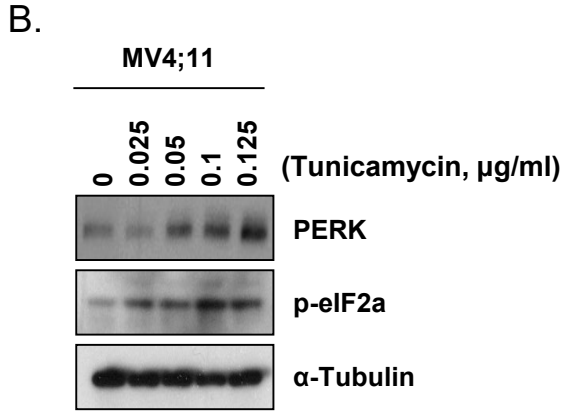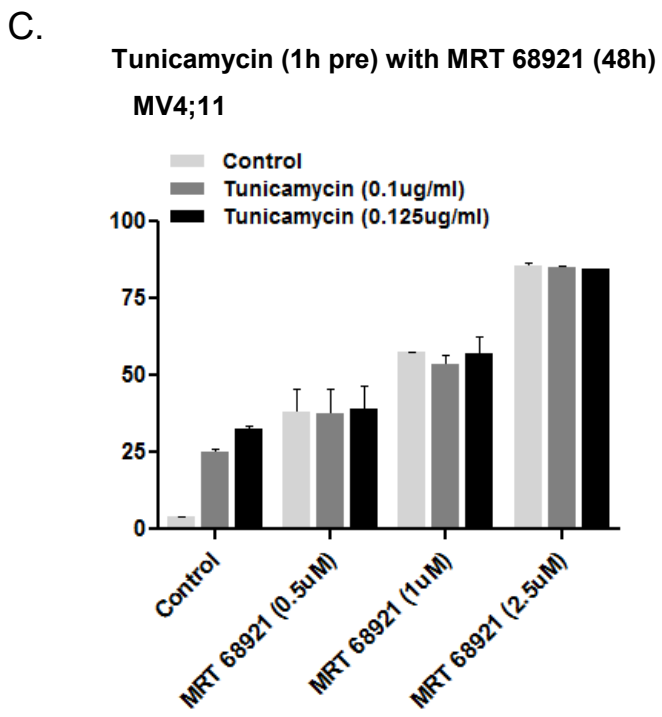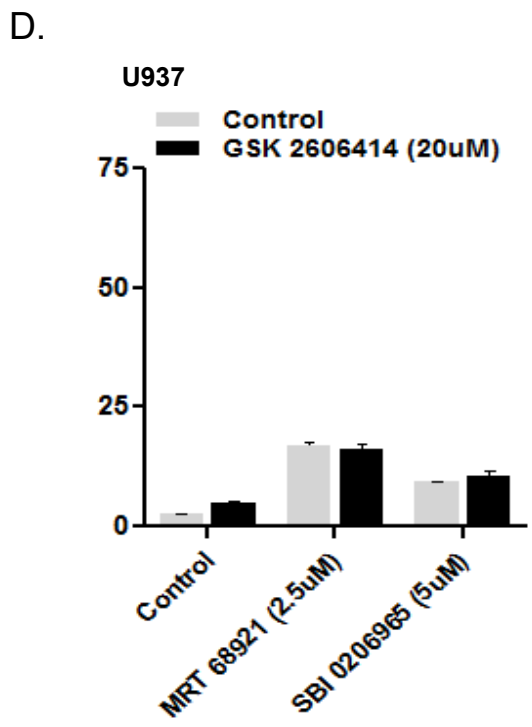

Figure S3.

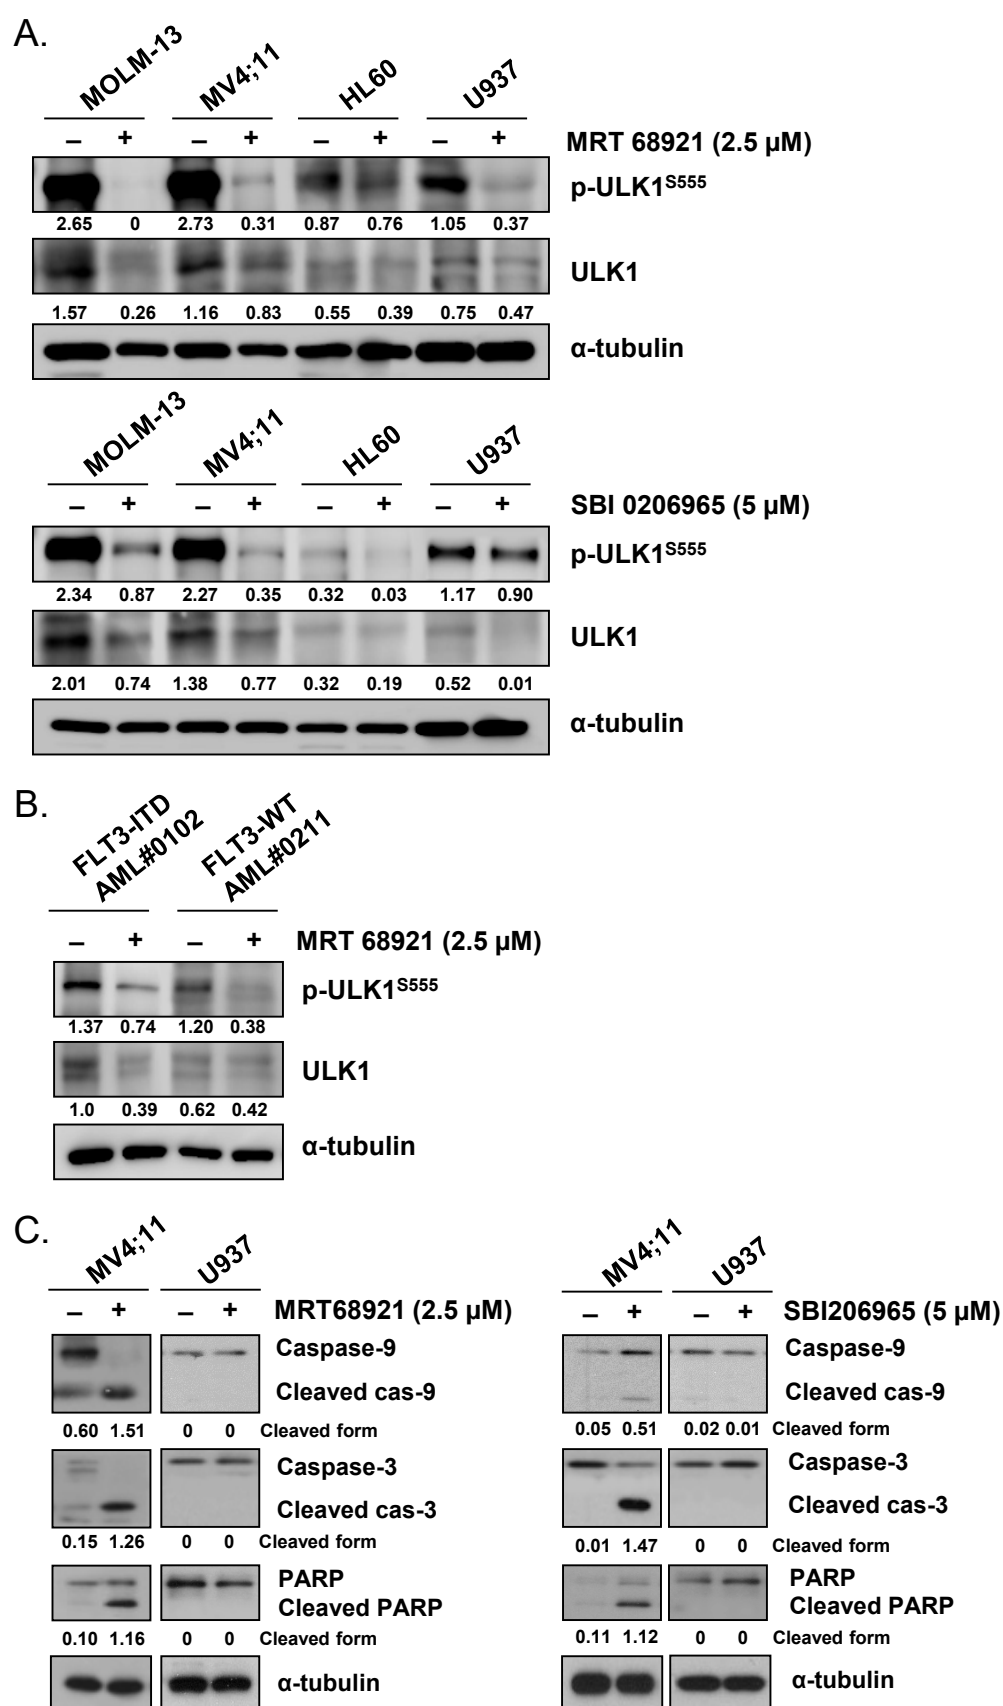

Figure S4.

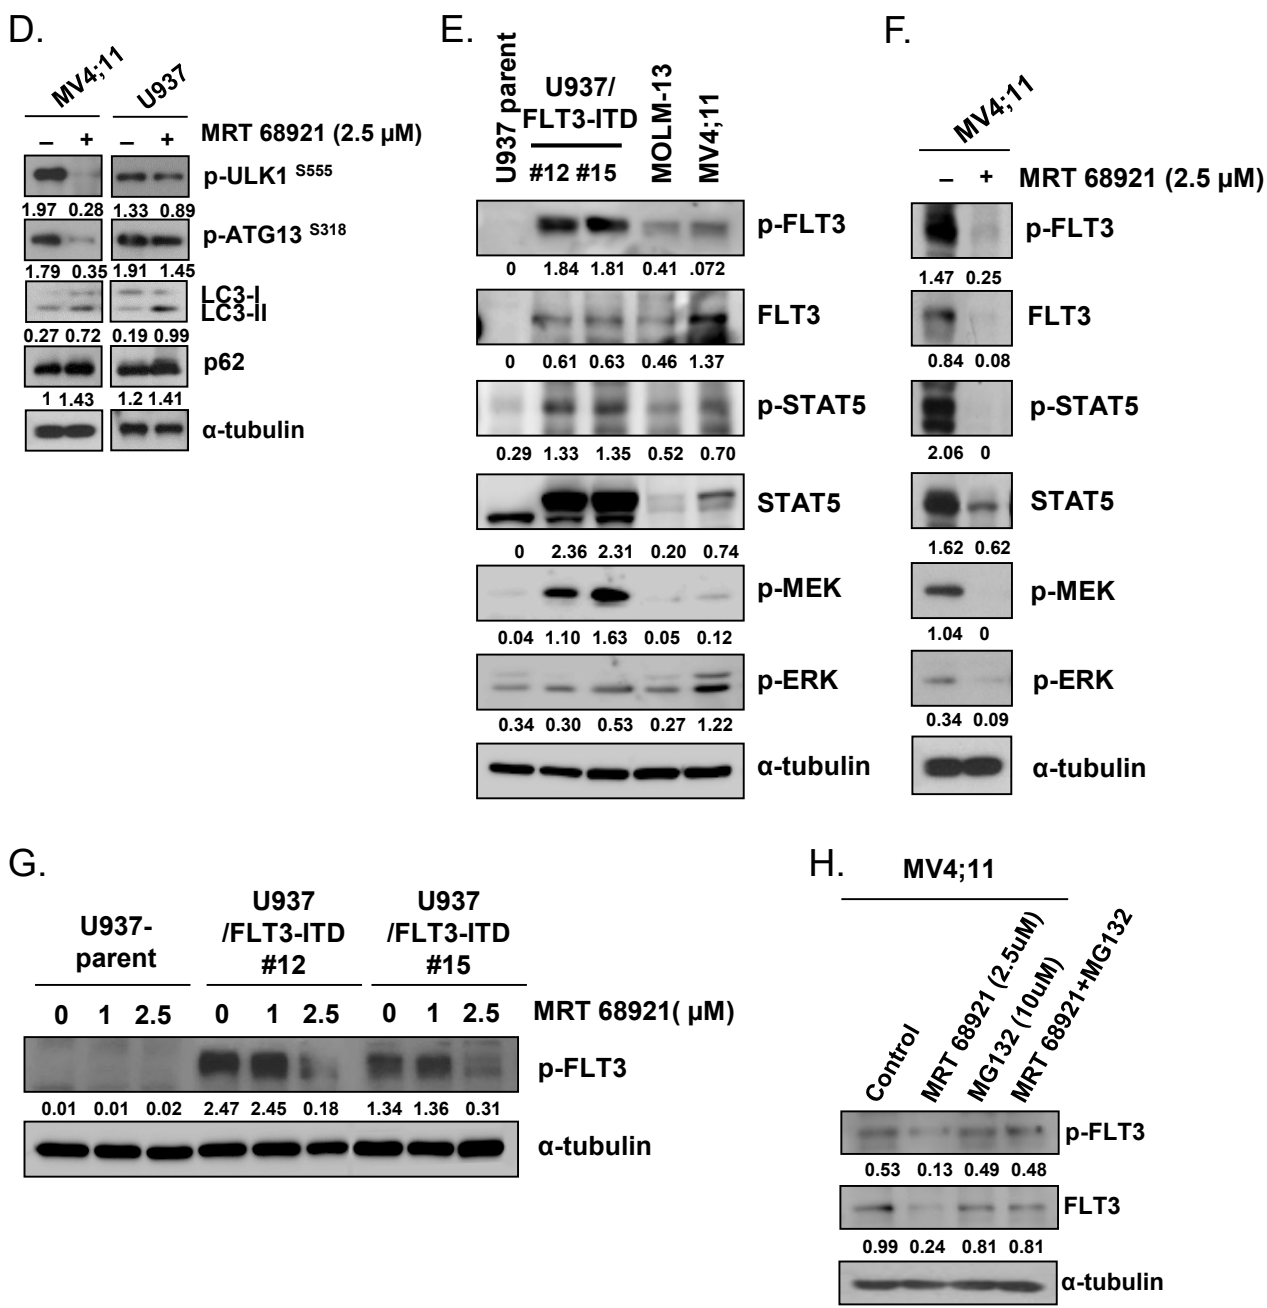

Figure S5.
